# Supplementary material for: Application Potential of Trichoderma in the Degradation of Phenolic Acid-Modified Chitosan
Source: MDPI journal article supplement (doi:10.3390/foods12193669), 2023-10-05
Supplement: s1 [file s1]

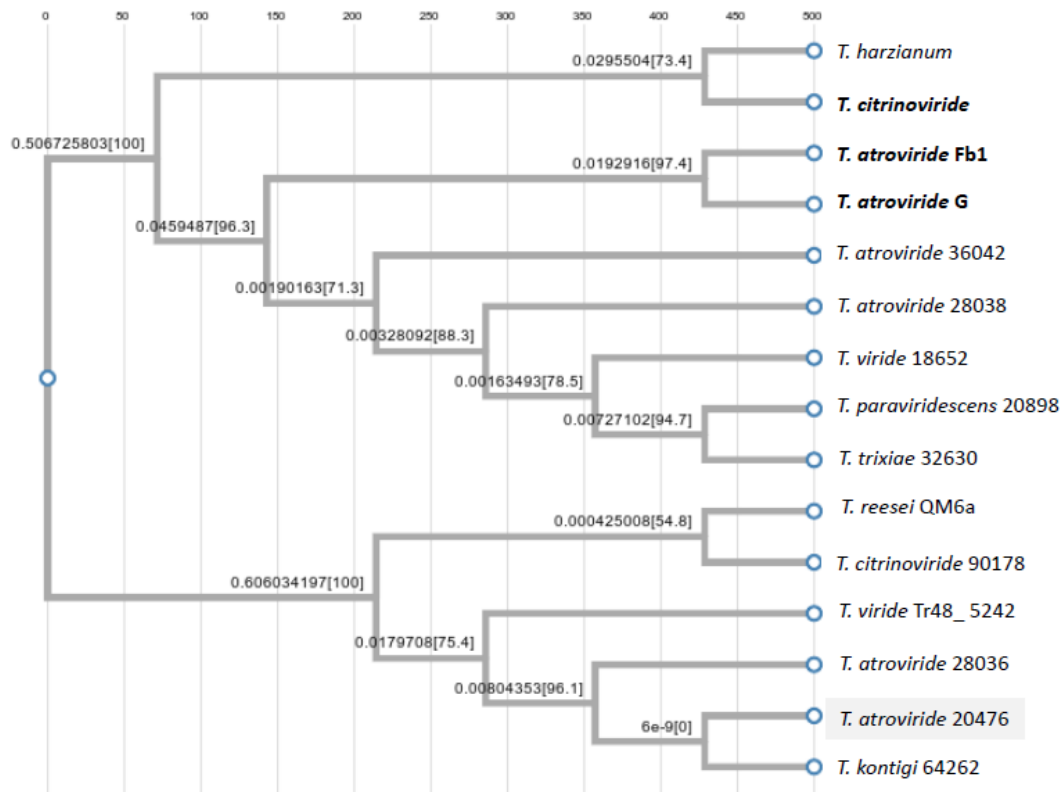

**Figure S1.** Dendrogram prepared using nucleotide sequences of the ITS region of the 18S rRNA gene and using Clustal W (<https://www.genome.jp/tools-bin/clustalw>). Sequences from NCBI's GeneBank were used to analysis: (Acc. no. OP586652.1) *T. citrinoviride*, (OP586653.1) *T. atroviride* G, (OP586643.1), *T. atroviride* isolate Fb1, (AY380909.1) *T. viride* strain ATCC 28038, (X93978.1) *T. viride* strain ATCC 18652, (AF279395.1) *T. citrinoviride* strain ATCC 90178, (JQ745264.1) *T. atroviride* strain ATCC 20476, (AF278796.1) *T. atroviride* strain ATCC 36042, (AF127152.1) *T. atroviride* ATCC 28036, (DQ315445.1) *Trichoderma trixiae* strain ATCC 32630, (NG\_059411.1) *Trichoderma koningii* ATCC 64262, (DQ315434.1) *Trichoderma paraviridescens* strain ATCC 20898, (AF127154.1) *Trichoderma reesei* QM6a ATCC 13631, (AF127145.1) *T. viride* strain Tr48 ATCC 5242, (AY625068.1) *Trichoderma harzianum* strain NRRL 13019.
